# Supplementary material for: Schizophrenia Detection Using Machine Learning Approach from Social Media Content
Source: MDPI journal article supplement (doi:10.3390/s21175924), 2021-09-03
Supplement: s1 [file s1]

# Supplementary Materials for Schizophrenia detection using machine learning approach from social media content

## 1. Dataset

Supplementary Table 1 summarizes the information of the collected data from Reddit.

**Table S1.** Summary of the collected data from Reddit.

| Group                       | Subreddit     | Number of posts | Number of tokens | Mean (SD) post length | Mean (SD) token length |
|-----------------------------|---------------|-----------------|------------------|-----------------------|------------------------|
| Schizophrenia               | Schizophrenia | 13,156          | 776,204          | 326.07 (360.56)       | 5.59 (1.64)            |
|                             | Fitness       | 28,660          | 1,340,959        | 252.62 (275.97)       | 5.39 (1.61)            |
|                             | Jokes         | 83,456          | 1,229,411        | 79.12 (187.35)        | 5.37 (1.66)            |
| Non-schizophrenia (Control) | Meditation    | 11,976          | 633,322          | 286.21 (401.98)       | 5.41 (1.56)            |
|                             | Parenting     | 23,489          | 1791,109         | 403.56 (372.02)       | 5.29 (1.53)            |
|                             | Relationships | 97,038          | 15,217,239       | 828.91 (631.21)       | 5.28 (1.63)            |
|                             | Teaching      | 2950            | 173,895          | 329.66 (371.66)       | 5.59 (1.64)            |

SD = standard deviation

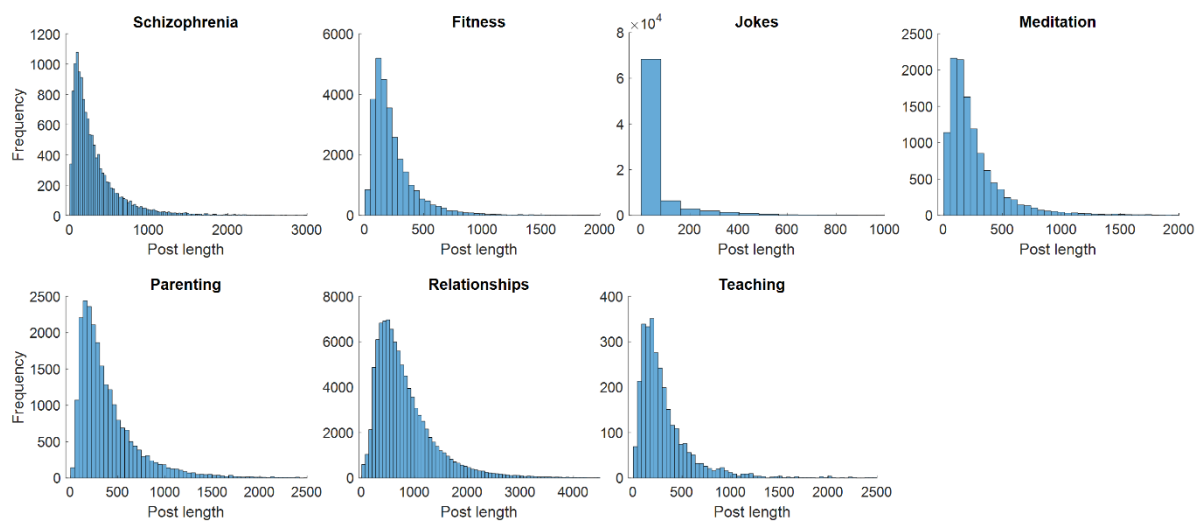

**Figure S1.** Histogram of post lengths as measured by the length of tokens for each subreddit.

## 2. Comparison of Algorithm Performance Based on the Input Features

All models performed better when all features (LIWC and topic distributions) were included in the model; therefore, all subsequent analyses were based only on these models with all combined features. The random forest algorithm consistently outperformed all the other algorithms regardless of the type of input data (Supplementary Table S2; Supplementary Figure S2).

**Table S2.** Classification performance of the machine learning classifiers.

| Feature set | Model                        | Recall | Precision | F1-score | Accuracy | AUC  |
|-------------|------------------------------|--------|-----------|----------|----------|------|
| LIWC        | Random forest (RF)           | 0.92   | 0.98      | 0.95     | 0.95     | 0.95 |
|             | Support vector machine (SVM) | 0.88   | 0.88      | 0.88     | 0.88     | 0.88 |
|             | Logistic regression (LR)     | 0.85   | 0.85      | 0.85     | 0.85     | 0.85 |
|             | Naive Bayes (NB)             | 0.80   | 0.81      | 0.80     | 0.80     | 0.81 |
| Topic       | Random forest (RF)           | 0.92   | 0.97      | 0.94     | 0.95     | 0.95 |
|             | Support vector machine (SVM) | 0.93   | 0.94      | 0.93     | 0.90     | 0.94 |
|             | Logistic regression (LR)     | 0.82   | 0.88      | 0.85     | 0.85     | 0.86 |
|             | Naive Bayes (NB)             | 0.80   | 0.81      | 0.80     | 0.79     | 0.84 |
| Joint       | Random forest (RF)           | 0.94   | 0.98      | 0.96     | 0.96     | 0.97 |
|             | Support vector machine (SVM) | 0.91   | 0.90      | 0.91     | 0.91     | 0.91 |
|             | Logistic regression (LR)     | 0.87   | 0.91      | 0.89     | 0.89     | 0.90 |
|             | Naive Bayes (NB)             | 0.87   | 0.82      | 0.93     | 0.86     | 0.87 |

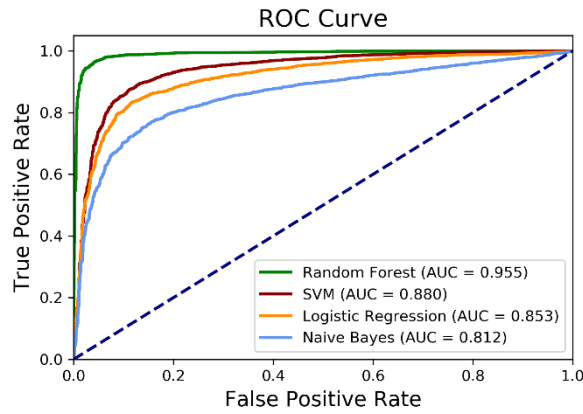

(a)

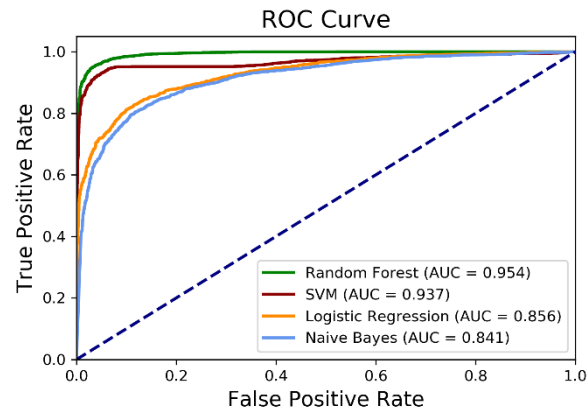

(b)

**Figure S2.** Algorithm performance based on the input features entered in the model. Shown are the receiver operating characteristic (ROC) curves for the classification based on (a) LIWC features alone and (b) topic features alone. Additional details are provided in Supplementary Table S2.

### 3. Feature Importance

By applying the SHAP approach to the random forest model, we estimated the feature importance to determine features key to distinguishing schizophrenia posts from

control posts. The SHAP feature importance quantified as the mean absolute Shapley value for all features is listed in Supplementary Table S3.

**Table S3.** Ranked list of the features with the mean absolute Shapley value (descending order).

| Rank-<br>ing | Feature                             | Mean absolute Shap-<br>ley value | Rank-<br>ing | Feature                              | Mean absolute Shap-<br>ley value |
|--------------|-------------------------------------|----------------------------------|--------------|--------------------------------------|----------------------------------|
| 1            | Third person singular               | 0.106037                         | 22           | Fitness/Exercise (Non-SCZ topic)     | 0.006893                         |
| 2            | Third person plural                 | 0.077902                         | 23           | Feel/Relationship (Non-SCZ topic)    | 0.006732                         |
| 3            | Meditation/Weight (non-SCZ topic)   | 0.053068                         | 24           | Third person plural                  | 0.006570                         |
| 4            | Hallucinations (SCZ topic)          | 0.045677                         | 25           | Social interaction (SCZ topic)       | 0.005944                         |
| 5            | Friend (non-SCZ topic)              | 0.045103                         | 26           | Joke (non-SCZ topic)                 | 0.005077                         |
| 6            | Mental health help (SCZ topic)      | 0.044755                         | 27           | Friend/Home/School (non-SCZ topic)   | 0.004546                         |
| 7            | School/Teaching (non-SCZ topic)     | 0.031163                         | 28           | Impersonal pronouns                  | 0.004194                         |
| 8            | Life (SCZ topic)                    | 0.030233                         | 29           | Second person                        | 0.003761                         |
| 9            | Word count                          | 0.028808                         | 30           | Thought disorder/Episode (SCZ topic) | 0.003356                         |
| 10           | Fear                                | 0.026922                         | 31           | Present focus                        | 0.003088                         |
| 11           | Social/Life (non-SCZ topic)         | 0.021443                         | 32           | Negative emotion                     | 0.002936                         |
| 12           | Time/Sleep (non-SCZ topic)          | 0.015646                         | 33           | Anticipation                         | 0.002657                         |
| 13           | Schizophrenia/Diagnosis (SCZ topic) | 0.014710                         | 34           | Positive emotion                     | 0.002326                         |
| 14           | Words longer than six letters       | 0.013840                         | 35           | Trust                                | 0.001914                         |
| 15           | First person singular               | 0.013036                         | 36           | Disgust                              | 0.001722                         |
| 16           | Personal pronouns                   | 0.010836                         | 37           | Negative symptoms (SCZ topic)        | 0.001681                         |
| 17           | Family (SCZ topic)                  | 0.010804                         | 38           | Surprise                             | 0.001636                         |
| 18           | Medicine/Medication (SCZ topic)     | 0.009328                         | 39           | Sadness                              | 0.001586                         |
| 19           | Joy                                 | 0.008279                         | 40           | Past focus                           | 0.001384                         |
| 20           | Family (non-SCZ topic)              | 0.007345                         | 41           | Anger                                | 0.001291                         |
| 21           | Delusion (SCZ topic)                | 0.006944                         | 42           | Future focus                         | 0.001224                         |

### 3. Reliability Analyses

#### 3.1. Reliability of Unsupervised Clustering Results Using TF-IDF Features with Bigrams

In the main manuscript, we showed unsupervised clustering results using TF-IDF features with unigrams (i.e., a sequence of one word in a sentence). To test the reliability of the unsupervised clustering results, we repeated the analyses using TF-IDF features with bigrams (i.e., a sequence of two words in a sentence). The results remained consistent when an alternative bigram vectorization technique along with TF-IDF features was used to identify language markers of schizophrenia (Supplementary Figure S3 and Table S4).

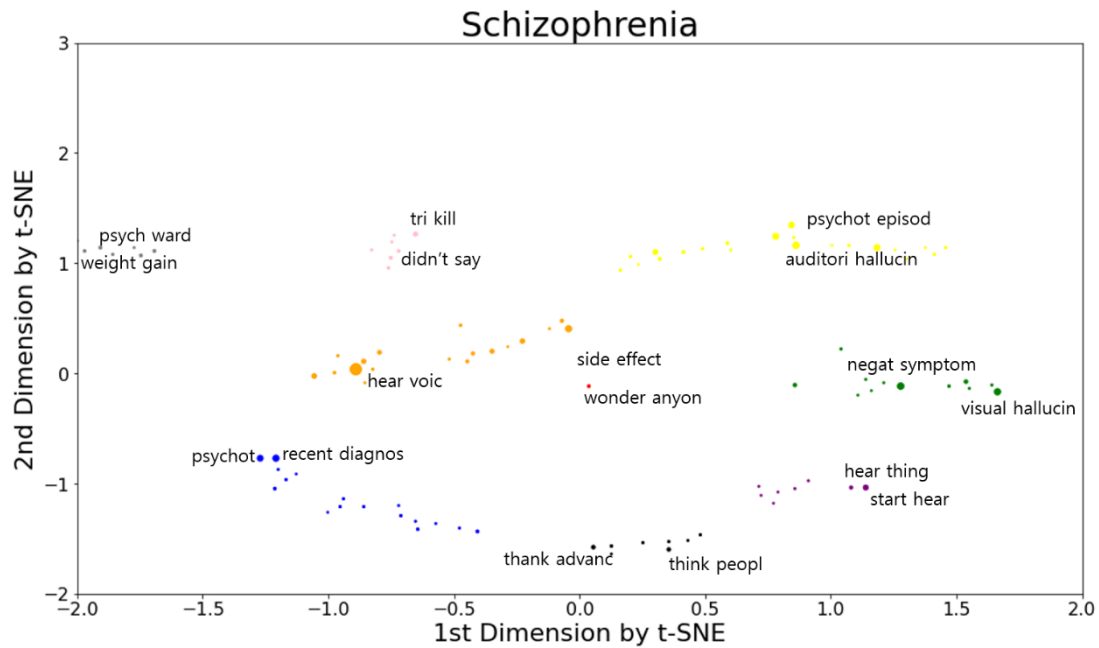

**Figure S3.** Text plot of words that distinguish the language of the schizophrenia group from the non-schizophrenia (control) group. The 100 most predictive words for schizophrenia derived using TF-IDF features with bigrams. Words are projected in a 2D space based on their document vectors, after dimensionality reduction with t-SNE. Colors indicate clusters assigned by DBSCAN. In each cluster, the top two most predictive words are labeled.

**Table S4.** Lists of the most predictive words for schizophrenia.

| Cluster color | Semantic content        | Words in cluster                                                                                                                                                                                                                                                 |
|---------------|-------------------------|------------------------------------------------------------------------------------------------------------------------------------------------------------------------------------------------------------------------------------------------------------------|
| Orange        | Symptoms/Hallucinations | hear voic, side effect, anyon els, get help, mental ill, get wors, mental health, see thing, im scare, make sens, doe anyon, see peopl, sound, go back, even know, thing like, would say, im afraid                                                              |
| Yellow        | Symptoms/Psychosis      | psychot episod, auditori hallucin, take medic, voic head, take med, smoke weed, think might, sometim feel, thing happen, go away, start think, im sorr, becaus thought, need get, panic attack, would go, onli thing, tri help, thank read, dure time, like feel |
| Red           | Help                    | wonder anyon, time befor                                                                                                                                                                                                                                         |
| Green         | Negative symptoms       | negat symptom, visual hallucin, stop take, peopl talk, talk peopl, anyon know, peopl know, sinc ive, fall asleep, start say, wish could, im onli                                                                                                                 |
| Purple        | Symptoms/Hearing        | start hear, hear thing, live life, could tell, four year, first start, ago start, make ani                                                                                                                                                                       |
| Pink          | Life problems           | tri kill, didnt say, hi everyon, feel free, anyon ever, becaus hes, intrus thought                                                                                                                                                                               |
| Black         | Support/Advice          | thank advanc, think peopl, love one, see doctor, veri long, would great, great appreci, see therapist                                                                                                                                                            |
| Gray          | Health                  | weight gain, psych ward, like everyon, doesnt make, person disord, like even, know anyth                                                                                                                                                                         |

The words are organized in the clusters labeled by their color in Supplementary Figure S3, and by the general semantic content of the words in schizophrenia. The order of the clusters indicates the average predictiveness of the cluster of schizophrenia, with Symptoms/Hallucinations being the most predictive, and the Health cluster being the least predictive. The order of the words in each cluster indicates the order predictiveness within a cluster.

### 3.2. Reliability of Unsupervised Clustering Results Using Split-Half Datasets

To test the reliability of the unsupervised clustering results, we created split-half datasets by randomly resampling half of the posts and then performed the classification tasks on the split-half datasets 100 times. Using a number of split-half post datasets, the logistic regression classifiers achieved predictive accuracies (96–98%) for classification of schizophrenia posts similar to those with the original full datasets used in the main manuscript. We then repeated the same unsupervised clustering analyses on the regression weights estimated from half of the sample. The results remained consistent when analyses were restricted only to half of the posts. We provide representative clustering results from the first half of the posts (Supplementary Figure S4 and Table S5) and the second half of the posts (Supplementary Figure S5 and Table S6).

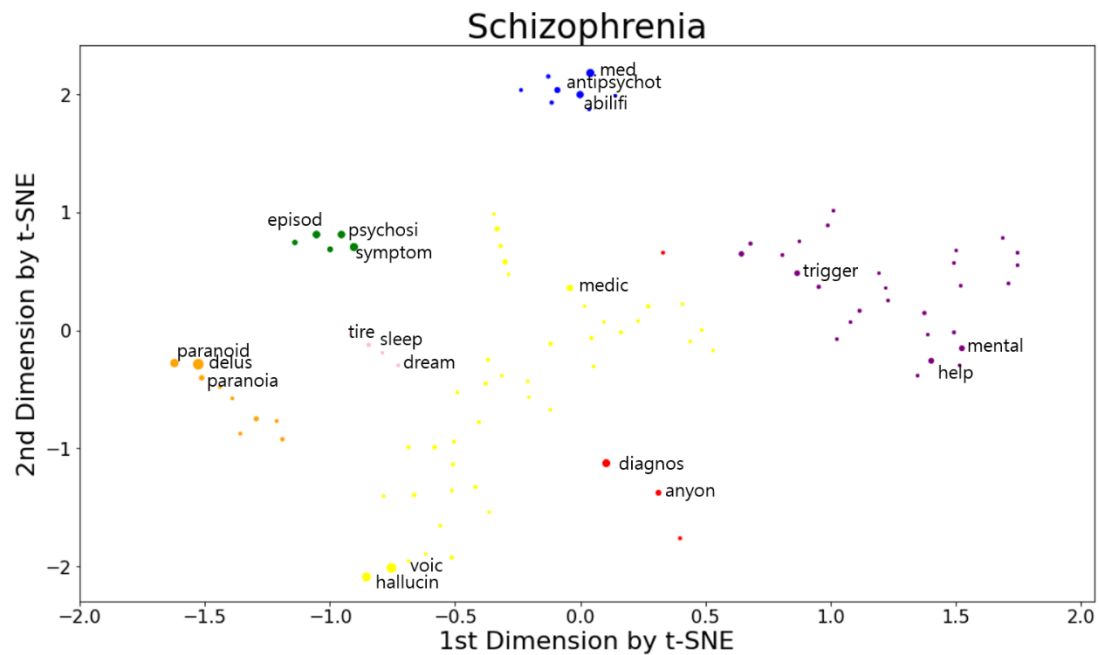

**Figure S4.** Text plot of words that distinguish the language of the schizophrenia group from the non-schizophrenia (control) group using the first half of the posts. The 100 most predictive words for schizophrenia using the first half of the posts. Words are projected in a 2D space based on their document vectors, after dimensionality reduction with t-SNE. Colors indicate clusters assigned by DBSCAN. In each cluster, the top three most predictive words are labeled.

**Table S5.** Lists of the most predictive words for schizophrenia using the first half of the posts.

| Cluster color | Semantic content        | Words in cluster                                                                                                                                                                                                                                                                                                 |
|---------------|-------------------------|------------------------------------------------------------------------------------------------------------------------------------------------------------------------------------------------------------------------------------------------------------------------------------------------------------------|
| Purple        | Mental health help      | help, mental, trigger, experi, insight, understand, wonder, hello, ill, live, hope, suffer, curious, post, support, job, pleas, univers, inform, spoke, ani, veri, communiti, charact, member, public, found, comment                                                                                            |
| Orange        | Delusions               | delus, paranoid, paranoia, realiti, real, mind, delusion, peopl, harm                                                                                                                                                                                                                                            |
| Yellow        | Symptoms/Hallucinations | voic, hallucin, medic, hospit, psychiatrist, scare, feel, anybodi, psych, ago, think, shower, demon, talk, im, develop, stare, havent, normal, shadow, treatment, weird, someth, degre, vent, go, brain, appoint, bare, everyon, god, mesag, function, exact, slowli, sometim, wish, random, face, medicin, head |
| Green         | Psychosis/Disorder      | symptom, episod, psychosi, psychot, disord                                                                                                                                                                                                                                                                       |
| Blue          | Medicine/Medication     | med, abilifi, antipsychot, dose, effect, prescrib, gain, pill                                                                                                                                                                                                                                                    |
| Red           | Diagnose/Diagnosis      | diagnos, diagnosi, anyon, anymor, els                                                                                                                                                                                                                                                                            |
| Pink          | Sleep issues            | sleep, dream, tire, idk                                                                                                                                                                                                                                                                                          |

The words are organized in the clusters labeled by their color in Supplementary Figure S4, and by the general semantic content of the words in schizophrenia. The order of the clusters indicates the average predictiveness of the cluster of schizophrenia, with Mental health help being the most predictive, and the Sleep issues cluster being the least predictive.

The order of the words in each cluster indicates the order predictiveness within a cluster.

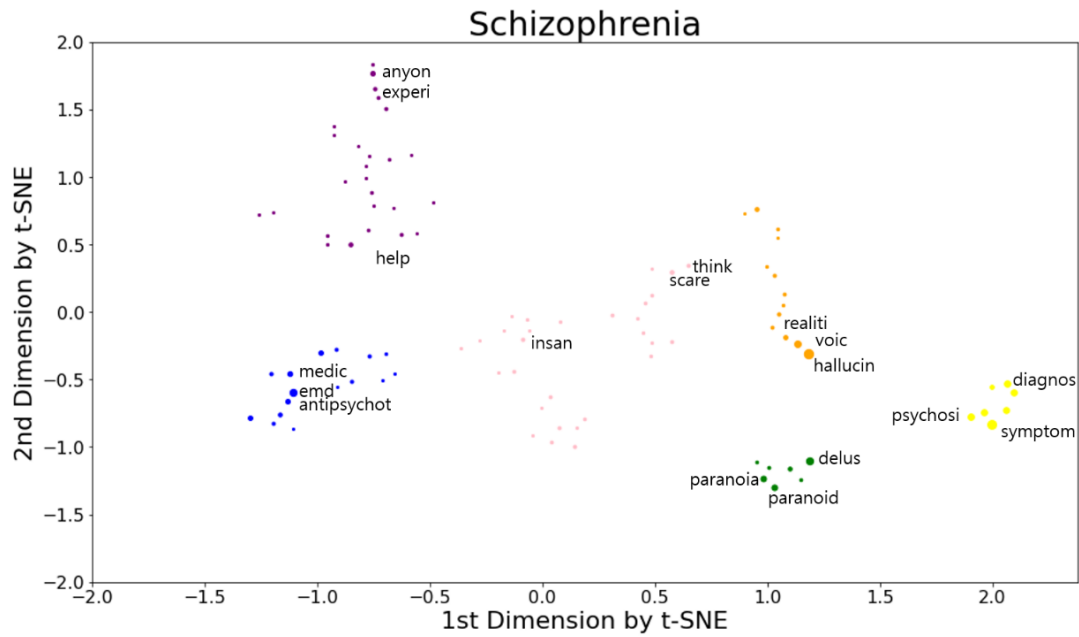

**Figure S5.** Text plot of words that distinguish the language of the schizophrenia group from the non-schizophrenia (control) group using the second half of the posts. The 100 most predictive words for schizophrenia using the second half of the posts. Words are projected in a 2D space based on their document vectors, after dimensionality reduction with t-SNE. Colors indicate clusters assigned by DBSCAN. In each cluster, the top three most predictive words are labeled.

**Table S6.** Lists of the most predictive words for schizophrenia using the second half of the posts.

| Cluster color | Semantic content        | Words in cluster                                                                                                                                                                                                             |
|---------------|-------------------------|------------------------------------------------------------------------------------------------------------------------------------------------------------------------------------------------------------------------------|
| Yellow        | Symptom/Psychosis       | symptom, psychosi, diagnos, episod, diagnosi, psychot, disord                                                                                                                                                                |
| Green         | Delusions               | delus, paranoid, paranoia, delusion, ocd, believ, sign                                                                                                                                                                       |
| Red           | Mental illness          | ill, mental                                                                                                                                                                                                                  |
| Blue          | Medicine/Medication     | med, medic, antipsychot, hospit, abilifi, prescrib, psychi-<br>atrist, psych, medicin, effect, treatment, function, pill,<br>caus, appoint, gain                                                                             |
| Orange        | Symptoms/Hallucinations | hallucin, voic, realiti, im, real, sometim, sens, head, feel,<br>someth, thought, like, dont                                                                                                                                 |
| Purple        | Mental health help      | anyon, help, experi, relat, job, wonder, stori, support,<br>famili, subreddit, communiti, els, pleas, hello, inform,<br>ani, danger, condit, disabl, messag, affect, wish, hi, suf-<br>fer, brother, today                   |
| Pink          | Life problems           | scare, insan, think, demon, shadow, anybodi, someone,<br>talk, brain, stare, anymor, ago, trigger, peop', under-<br>stand, outsid, mayb, life, everyon, sleep, memori, god,<br>random, idk, sort, odd, dream, shower, normal |

The words are organized in the clusters labeled by their color in Supplementary Figure S5, and by the general semantic content of the words in schizophrenia. The order of the clusters indicates the average predictiveness of the cluster of schizophrenia, with Symptoms/Psychosis being the most predictive, and the Life problems cluster being the least predictive. The order of the words in each cluster indicates the order predictiveness within a cluster.
